# Supplementary material for: Discover overlooked complications after preeclampsia from three real-world medical record datasets of over 100,000 pregnancies
Source: bioRxiv or medRxiv preprint supplement (doi:10.1101/2023.12.05.23299296), 2024-11-02
Supplement: Supplementary file [file media-1.pdf]

**Supplementary Table 1. Case-control Selection Criteria Based on ICD-10 Codes.**

| Group                                                                                                                                   | Operation | Condition                                                | ICD-10 Codes       | ICD-9 Codes         |
|-----------------------------------------------------------------------------------------------------------------------------------------|-----------|----------------------------------------------------------|--------------------|---------------------|
| <b>Case</b>                                                                                                                             | Inclusion | Preeclampsia                                             | O14                | 642.4, 642.5, 642.7 |
| <b>Control</b>                                                                                                                          | Inclusion | Normal Pregnancy                                         | Z34, Z35, Z36, Z37 | V22                 |
|                                                                                                                                         | Exclusion | Pre-eclampsia                                            | O14                | 642.4, 642.5, 642.7 |
|                                                                                                                                         |           | Pre-existing hypertension complicating pregnancy         | O10                | 642.0, 642.1, 642.2 |
|                                                                                                                                         |           | Pre-existing hypertension with pre-eclampsia             | O11                | 642.7               |
|                                                                                                                                         |           | Gestational edema and proteinuria without hypertension   | O12                | 646.1, 646.2        |
|                                                                                                                                         |           | Gestational hypertension without significant proteinuria | O13                | 642.3               |
|                                                                                                                                         |           | Eclampsia                                                | O15                | 642.6               |
|                                                                                                                                         |           | Unspecified maternal hypertension                        | O16                | 642.3, 642.9        |
| <p>Note: The listed ICD code hierarchically includes all ICD codes starting with it (e.g. O14 includes O14.1, O14.12, O14.3, etc.).</p> |           |                                                          |                    |                     |
