# Supplementary material for: Discover overlooked complications after preeclampsia from three real-world medical record datasets of over 100,000 pregnancies
Source: bioRxiv or medRxiv preprint supplement (doi:10.1101/2023.12.05.23299296), 2024-11-02
Supplement: Supplementary file [file media-2.pdf]

**Supplementary Table 2. ICD-10 Codes for Elixhauser Comorbidities.**

| <b>Comorbidity</b>                     | <b>ICD-10 Codes</b>                                                                                                             |
|----------------------------------------|---------------------------------------------------------------------------------------------------------------------------------|
| <b>Congestive heart failure</b>        | I09.9, I11.0, I13.0, I13.2, I25.5, I42.0, I42.5 - I42.9, I43.x, I50.x, P29.0                                                    |
| <b>Cardiac arrhythmias</b>             | I44.1 - I44.3, I45.6, I45.9, I47.x - I49.x, R00.0, R00.1, R00.8, T82.1, Z45.0, Z95.0                                            |
| <b>Valvular disease</b>                | A52.0, I05.x - I08.x, I09.1, I09.8, I34.x - I39.x, Q23.0 - Q23.3, Z95.2 - Z95.4                                                 |
| <b>Pulmonary circulation disorders</b> | I26.x, I27.x, I28.0, I28.8, I28.9                                                                                               |
| <b>Peripheral vascular disorders</b>   | I70.x, I71.x, I73.1, I73.8, I73.9, I77.1, I79.0, I79.2, K55.1, K55.8, K55.9, Z95.8, Z95.9                                       |
| <b>Hypertension, uncomplicated</b>     | I10.x                                                                                                                           |
| <b>Hypertension, complicated</b>       | I11.x - I13.x, I15.x                                                                                                            |
| <b>Paralysis</b>                       | G04.1, G11.4, G80.1, G80.2, G81.x, G82.x, G83.0 - G83.4, G83.9                                                                  |
| <b>Other neurological disorders</b>    | G10.x - G13.x, G20.x - G22.x, G25.4, G25.5, G31.2, G31.8, G31.9, G32.x, G35.x - G37.x, G40.x, G41.x, G93.1, G93.4, R47.0, R56.x |
| <b>Chronic pulmonary disease</b>       | I27.8, I27.9, J40.x - J47.x, J60.x - J67.x, J68.4, J70.1, J70.3                                                                 |
| <b>Diabetes, uncomplicated</b>         | E10.0, E10.1, E10.9, E11.0, E11.1, E11.9, E12.0, E12.1, E12.9, E13.0, E13.1, E13.9, E14.0, E14.1, E14.9                         |

|                                                        |                                                                                                                         |
|--------------------------------------------------------|-------------------------------------------------------------------------------------------------------------------------|
| <b>Diabetes, complicated</b>                           | E10.2 - E10.8, E11.2 - E11.8, E12.2 - E12.8, E13.2 - E13.8, E14.2 - E14.8                                               |
| <b>Hypothyroidism</b>                                  | E00.x - E03.x, E89.0                                                                                                    |
| <b>Liver disease</b>                                   | B18.x, I85.x, I86.4, I98.2, K70.x, K71.1, K71.3 - K71.5, K71.7, K72.x - K74.x, K76.0, K76.2 - K76.9, Z94.4              |
| <b>Peptic ulcer disease, excluding bleeding</b>        | K25.7, K25.9, K26.7, K26.9, K27.7, K27.9, K28.7, K28.9                                                                  |
| <b>AIDS/HIV</b>                                        | B20.x - B22.x, B24.x                                                                                                    |
| <b>Lymphoma</b>                                        | C81.x - C85.x, C88.x, C96.x, C90.0, C90.2                                                                               |
| <b>Metastatic cancer</b>                               | C77.x - C80.x                                                                                                           |
| <b>Solid tumor without metastasis</b>                  | C00.x - C26.x, C30.x - C34.x, C37.x - C41.x, C43.x, C45.x - C58.x, C60.x - C76.x, C97.x                                 |
| <b>Rheumatoid arthritis/collagen vascular diseases</b> | L94.0, L94.1, L94.3, M05.x, M06.x, M08.x, M12.0, M12.3, M30.x, M31.0 - M31.3, M32.x - M35.x, M45.x, M46.1, M46.8, M46.9 |
| <b>Coagulopathy</b>                                    | D65 - D68.x, D69.1, D69.3 - D69.6                                                                                       |
| <b>Obesity</b>                                         | E66.x                                                                                                                   |
| <b>Weight loss</b>                                     | E40.x - E46.x, R63.4, R64                                                                                               |
| <b>Fluid and electrolyte disorders</b>                 | E22.2, E86.x, E87.x                                                                                                     |

|                           |                                                                                |
|---------------------------|--------------------------------------------------------------------------------|
| <b>Blood loss anaemia</b> | D50.0                                                                          |
| <b>Deficiency anemia</b>  | D50.8, D50.9, D51.x - D53.x                                                    |
| <b>Alcohol abuse</b>      | F10, E52, G62.1, I42.6, K29.2, K70.0, K70.3, K70.9, T51.x, Z50.2, Z71.4, Z72.1 |
| <b>Drug abuse</b>         | F11.x - F16.x, F18.x, F19.x, Z71.5, Z72.2                                      |
| <b>Psychoses</b>          | F20.x, F22.x - F25.x, F28.x, F29.x, F30.2, F31.2, F31.5                        |
| <b>Depression</b>         | F20.4, F31.3 - F31.5, F32.x, F33.x, F34.1, F41.2, F43.2                        |
