# Supplementary material for: Discover overlooked complications after preeclampsia from three real-world medical record datasets of over 100,000 pregnancies
Source: bioRxiv or medRxiv preprint supplement (doi:10.1101/2023.12.05.23299296), 2024-11-02
Supplement: Supplementary file [file media-3.pdf]

**DeficiencyAnemia**

TRUE FALSE FALSE

**Depression**

TRUE FALSE

**DiabetesComplicated**

TRUE TRUE

**DiabetesUncomplicated**

TRUE TRUE

**DrugAbuse**

TRUE FALSE

**FluidElectrolyteDisorders**

TRUE TRUE

**HypertensionComplicated**

TRUE TRUE

**HypertensionUncomplicated**

TRUE TRUE

**Hypothyroidism**

TRUE TRUE

**LiverDisease**

TRUE TRUE

**Lymphoma**

FALSE TRUE

**Obesity**

TRUE TRUE

**OtherNeurologicalDisorders**

TRUE FALSE

**Paralysis**

TRUE TRUE TRUE FALSE FALSE FALSE FALSE FALSE FALSE FALSE

**PeripheralVascularDisorders**

TRUE TRUE TRUE TRUE TRUE TRUE TRUE TRUE FALSE FALSE

**Psychoses**

FALSE TRUE TRUE TRUE TRUE TRUE TRUE FALSE FALSE TRUE

**PulmonaryCirculationDisorders**

TRUE TRUE

**RenalFailure**

TRUE TRUE

**RheumatoidArthritisCollagenVascularDiseases**

TRUE FALSE

**ValvularDisease**

TRUE FALSE

**WeightLoss**

TRUE TRUE

**SmokingStatusMapped**

TRUE TRUE

**AlcoholUseStatusMapped**

TRUE TRUE TRUE FALSE FALSE FALSE FALSE FALSE FALSE FALSE

**IllegalDrugUserStatusMapped**

TRUE TRUE TRUE TRUE TRUE TRUE TRUE TRUE TRUE TRUE

**SexuallyActiveStatusMapped**

TRUE TRUE TRUE TRUE FALSE FALSE FALSE FALSE FALSE FALSE

**CigarettesYN**

TRUE TRUE TRUE TRUE TRUE TRUE TRUE TRUE TRUE TRUE

**CigarsYN**

TRUE TRUE TRUE TRUE TRUE TRUE TRUE TRUE TRUE TRUE

**IVDrugUserYN**

FALSE FALSE FALSE FALSE FALSE TRUE FALSE FALSE FALSE FALSE

**African American**

TRUE TRUE TRUE TRUE TRUE TRUE TRUE TRUE TRUE TRUE

**Other Races**

TRUE TRUE TRUE TRUE TRUE TRUE TRUE TRUE TRUE TRUE

**Caucasian**

TRUE TRUE TRUE TRUE TRUE TRUE TRUE TRUE TRUE TRUE
