# Supplementary material for: Discover overlooked complications after preeclampsia from three real-world medical record datasets of over 100,000 pregnancies
Source: bioRxiv or medRxiv preprint supplement (doi:10.1101/2023.12.05.23299296), 2024-11-02
Supplement: Supplementary file [file media-4.pdf]

**Supplementary Table 4. Features and Coefficients for Survival Analysis.**

| Feature                          | Hypertension |         | Diabetes Complicated |         | Congestive Heart Failure |         | Renal Failure |         | Obesity     |         | Hypothyroidism |         |
|----------------------------------|--------------|---------|----------------------|---------|--------------------------|---------|---------------|---------|-------------|---------|----------------|---------|
|                                  | Coefficient  | P value | Coefficient          | P value | Coefficient              | P value | Coefficient   | P value | Coefficient | P value | Coefficient    | P value |
| <b>AgeInYears</b>                | -0.023       | 0.000   | -0.020               | 0.001   | -0.050                   | 0.000   | -0.049        | 0.000   | -0.068      | 0.000   | -0.055         | 0.000   |
| <b>PE</b>                        | 1.810        | 0.000   | 0.527                | 0.000   | 0.627                    | 0.000   | 0.592         | 0.000   | 0.081       | 0.040   | -0.138         | 0.016   |
| <b>GestationalDiabetes</b>       | 0.042        | 0.479   | 2.119                | 0.000   | -0.073                   | 0.699   | -0.125        | 0.508   | 0.139       | 0.008   | -0.350         | 0.000   |
| <b>DiabetesComplicated</b>       | 0.290        | 0.012   | 2.909                | 0.000   | -0.171                   | 0.662   | 1.176         | 0.000   | -0.228      | 0.079   | -0.119         | 0.457   |
| <b>HypertensionUncomplicated</b> | 0.444        | 0.000   | 0.428                | 0.005   | 0.420                    | 0.041   | 0.506         | 0.017   | 0.407       | 0.000   | 0.034          | 0.711   |
| <b>Hypothyroidism</b>            | 0.246        | 0.000   | 0.562                | 0.000   | 0.637                    | 0.000   | 0.339         | 0.083   | 0.437       | 0.000   | 1.956          | 0.000   |
| <b>Obesity</b>                   | 0.558        | 0.000   | 1.038                | 0.000   | 0.245                    | 0.173   | 0.061         | 0.768   | 1.339       | 0.000   | -0.009         | 0.901   |
| <b>RenalFailure</b>              | -0.336       | 0.040   | -0.846               | 0.004   | 0.799                    | 0.011   | 1.979         | 0.000   | -0.199      | 0.155   | -0.276         | 0.173   |
| <b>CongestiveHeartFailure</b>    | -0.200       | 0.219   | 0.312                | 0.263   | 2.300                    | 0.000   | 0.335         | 0.374   | -0.360      | 0.015   | -0.094         | 0.627   |
| <b>SmokingStatusMapped</b>       | -0.070       | 0.068   | 0.229                | 0.012   | -0.087                   | 0.434   | -0.216        | 0.055   | -0.135      | 0.000   | -0.488         | 0.000   |
| <b>AlcoholUseStatusMapped</b>    | 0.053        | 0.161   | -0.141               | 0.116   | -0.112                   | 0.301   | 0.035         | 0.748   | 0.053       | 0.043   | 0.027          | 0.433   |
| <b>AfricanAmerican</b>           | 0.108        | 0.117   | -0.408               | 0.006   | 0.078                    | 0.707   | -0.737        | 0.000   | 0.080       | 0.093   | -0.855         | 0.000   |
| <b>Caucasian</b>                 | -0.051       | 0.390   | -0.539               | 0.000   | 0.187                    | 0.284   | -0.322        | 0.026   | 0.040       | 0.332   | -0.206         | 0.000   |
