# Supplementary material for: Discover overlooked complications after preeclampsia from three real-world medical record datasets of over 100,000 pregnancies
Source: bioRxiv or medRxiv preprint supplement (doi:10.1101/2023.12.05.23299296), 2024-11-02
Supplement: Supplementary file [file media-5.pdf]

**Supplementary Table 5. Populations of Case and Control Cohorts from 1~10 Years after Underlying Diagnosis in UM Database.**

| <b>Years after PE</b> | <b>Case</b> | <b>Control</b> |
|-----------------------|-------------|----------------|
| 1                     | 3024        | 14881          |
| 2                     | 2716        | 14821          |
| 3                     | 2428        | 14144          |
| 4                     | 2171        | 13474          |
| 5                     | 1870        | 12683          |
| 6                     | 1640        | 11817          |
| 7                     | 1446        | 10961          |
| 8                     | 1232        | 10027          |
| 9                     | 1043        | 9000           |
| 10                    | 348         | 6400           |
